# Supplementary material for: Disparities and Factors Associated with Coronavirus Disease-2019-Related Public Stigma: A Cross-Sectional Study in Thailand
Source: Int J Environ Res Public Health. 2022 May 25;19(11):6436. doi: 10.3390/ijerph19116436 (PMC9180735; doi:10.3390/ijerph19116436)
Supplement: Supplementary file 1 [file ijerph-19-06436-s001.zip › ijerph-1710632-supplementary.pdf]

## **Online Supplementary Materials**

### **Disparities and Factors Associated with Coronavirus Disease-2019-Related Public Stigma: A Cross-Sectional Study in Thailand**

Chidchanok Ruengorn, Ratanaporn Awiphan, Chabaphai Phosuya, Yongyuth Ruanta, Kednapa Thavorn, Nahathai Wongpakaran, Tinakon Wongpakaran, Surapon Nochaiwong\*; for the Health Outcomes and Mental Health Care Evaluation Survey Research Group (HOME-Survey)

#### **\*Correspondence and requests for materials:**

Surapon Nochaiwong, PharmD, Department of Pharmaceutical Care, Faculty of Pharmacy, Chiang Mai University, Chiang Mai 50200, Thailand, Phone: 66899973365, Fax: 6653222741, Email: [surapon.nochaiwong@cmu.ac.th](mailto:surapon.nochaiwong@cmu.ac.th)

## Supplementary Online Content

|                 |                                                                                                       |    |
|-----------------|-------------------------------------------------------------------------------------------------------|----|
| <b>Table S1</b> | Participants Characteristics According to the Degree of Stigma towards COVID-19 Infection in Thailand | S3 |
| <b>Table S2</b> | Linear Regression Model Results of Factors Associated with Stigma towards COVID-19 Infection (n=4004) | S6 |

**Table S1** Participants Characteristics According to the Degree of COVID-19-Related Public Stigma in Thailand

| Characteristics                               | Overall<br>(n=4,004) | COVID-19-related public stigma                 |                                                    |                                            | P Value |
|-----------------------------------------------|----------------------|------------------------------------------------|----------------------------------------------------|--------------------------------------------|---------|
|                                               |                      | No/minimal:<br>COVID-PSS ≤18<br>points (n=983) | Moderate:<br>COVID-PSS 19 –<br>25 points (n=1,364) | High:<br>COVID-PSS ≥26<br>points (n=1,657) |         |
| COVID-PSS, mean (SD); range                   | 24.2 (7.6); 10–50    | 14.9 (2.6); 10–18                              | 21.9 (2.0); 19–25                                  | 31.6 (4.8); 26–50                          | <0.001  |
| Age, year, mean (SD); range                   | 29.1 (10.8); 18–79   | 27.6 (9.0); 18–65                              | 27.9 (9.7); 18–79                                  | 30.8 (12.3); 18–73                         | <0.001  |
| ≤30                                           | 2,659 (66.4)         | 704 (71.6)                                     | 953 (69.9)                                         | 1,002 (60.5)                               | <0.001  |
| 31–50                                         | 1,088 (27.2)         | 253 (25.8)                                     | 355 (26.0)                                         | 480 (29.0)                                 |         |
| ≥51                                           | 257 (6.4)            | 26 (2.6)                                       | 56 (4.1)                                           | 175 (10.6)                                 |         |
| Sexual identity                               |                      |                                                |                                                    |                                            |         |
| Female                                        | 2,619 (65.4)         | 673 (68.5)                                     | 896 (65.7)                                         | 1,050 (63.4)                               | 0.001   |
| Male                                          | 1,231 (30.7)         | 260 (26.4)                                     | 415 (30.4)                                         | 556 (33.5)                                 |         |
| Others                                        | 154 (3.9)            | 50 (5.1)                                       | 53 (3.9)                                           | 51 (3.1)                                   |         |
| Marital status                                |                      |                                                |                                                    |                                            |         |
| Single                                        | 3,208 (80.1)         | 854 (86.9)                                     | 1,162 (85.2)                                       | 1,192 (71.9)                               | <0.001  |
| Married/domestic partnership                  | 693 (17.3)           | 115 (11.7)                                     | 170 (12.5)                                         | 408 (24.6)                                 |         |
| Divorced/widowed/ separated                   | 103 (2.6)            | 14 (1.4)                                       | 32 (2.3)                                           | 57 (3.4)                                   |         |
| Education level                               |                      |                                                |                                                    |                                            |         |
| Illiterate/primary school/ junior high school | 127 (3.2)            | 28 (2.8)                                       | 41 (3.0)                                           | 58 (3.5)                                   | 0.459   |
| Senior high school/diploma/ high vocational   | 1,893 (47.3)         | 482 (49.0)                                     | 654 (48.0)                                         | 757 (45.7)                                 |         |
| Bachelor's degree/ higher education           | 1,984 (49.5)         | 473 (48.1)                                     | 669 (49.0)                                         | 842 (50.8)                                 |         |
| Occupation                                    |                      |                                                |                                                    |                                            |         |
| Unemployed/retrieved                          | 391 (9.8)            | 95 (7.7)                                       | 129 (9.5)                                          | 167 (10.1)                                 | 0.035   |
| Employed                                      | 2,024 (50.5)         | 480 (48.8)                                     | 663 (48.6)                                         | 881 (53.2)                                 |         |
| College student                               | 1,589 (39.7)         | 408 (41.5)                                     | 572 (41.9)                                         | 609 (36.7)                                 |         |
| Religion                                      |                      |                                                |                                                    |                                            |         |
| Irreligion                                    | 375 (9.4)            | 143 (14.6)                                     | 126 (9.2)                                          | 106 (6.4)                                  | <0.001  |
| Buddhist                                      | 3,454 (86.3)         | 787 (80.1)                                     | 1,183 (86.7)                                       | 1,484 (89.6)                               |         |
| Christian/Muslim/Others                       | 175 (4.4)            | 53 (5.4)                                       | 55 (4.0)                                           | 67 (4.0)                                   |         |

Data are expressed as the frequency (percentage) of patients, unless otherwise indicated.

Abbreviations: COVID-19, coronavirus disease-2019; COVID-PSS, coronavirus disease-2019 Public Stigma Scale; SD, standard deviation.

**Table S1** Participants Characteristics According to the Degree of COVID-19-Related Public Stigma in Thailand (Continued)

| Characteristics                                 | Overall<br>(n=4,004) | COVID-19-related public stigma                 |                                                    |                                            | P Value |
|-------------------------------------------------|----------------------|------------------------------------------------|----------------------------------------------------|--------------------------------------------|---------|
|                                                 |                      | No/minimal:<br>COVID-PSS ≤18<br>points (n=983) | Moderate:<br>COVID-PSS 19 –<br>25 points (n=1,364) | High:<br>COVID-PSS ≥26<br>points (n=1,657) |         |
| Region of residence                             |                      |                                                |                                                    |                                            |         |
| Capital city and its environs                   | 1,425 (35.6)         | 412 (41.9)                                     | 498 (36.5)                                         | 515 (31.1)                                 | <0.001  |
| Non-capital city and its environs               | 2,579 (64.4)         | 571 (58.1)                                     | 866 (63.5)                                         | 1,142 (68.9)                               |         |
| Living status                                   |                      |                                                |                                                    |                                            |         |
| Alone                                           | 576 (14.4)           | 161 (16.4)                                     | 203 (14.9)                                         | 212 (12.8)                                 | 0.023   |
| With family                                     | 3,164 (79.0)         | 745 (75.8)                                     | 1,074 (78.7)                                       | 1,345 (81.2)                               |         |
| With others                                     | 264 (6.6)            | 77 (7.8)                                       | 87 (6.4)                                           | 100 (6.0)                                  |         |
| Person income, baht/month                       |                      |                                                |                                                    |                                            |         |
| ≤10,000                                         | 1,905 (47.6)         | 465 (47.3)                                     | 654 (47.9)                                         | 786 (47.4)                                 | 0.001   |
| 10,001–20,000                                   | 1,054 (26.3)         | 299 (30.4)                                     | 357 (26.2)                                         | 398 (24.0)                                 |         |
| >20,000                                         | 1,045 (26.1)         | 219 (22.3)                                     | 353 (25.9)                                         | 473 (28.6)                                 |         |
| Reimbursement scheme                            |                      |                                                |                                                    |                                            |         |
| Government/state enterprises                    | 539 (13.5)           | 112 (11.4)                                     | 157 (11.5)                                         | 270 (16.3)                                 | 0.002   |
| Universal coverage scheme                       | 1,329 (33.2)         | 346 (35.2)                                     | 466 (34.2)                                         | 517 (31.2)                                 |         |
| Social security scheme                          | 1,161 (29.0)         | 284 (28.9)                                     | 402 (29.5)                                         | 475 (28.7)                                 |         |
| Self-payment/others                             | 975 (24.3)           | 241 (24.5)                                     | 339 (24.8)                                         | 395 (23.8)                                 |         |
| History of mental illness                       | 359 (9.0)            | 108 (11.0)                                     | 115 (8.4)                                          | 136 (8.2)                                  | 0.041   |
| History of chronic NCDs <sup>†</sup>            | 599 (15.0)           | 122 (12.4)                                     | 177 (13.0)                                         | 300 (18.1)                                 | <0.001  |
| Income loss during the COVID-19 pandemic        | 1,664 (41.6)         | 398 (40.5)                                     | 539 (39.5)                                         | 727 (43.9)                                 | 0.040   |
| Financial problems during the COVID-19 pandemic | 2,012 (50.2)         | 485 (49.3)                                     | 651 (47.7)                                         | 876 (52.9)                                 | 0.016   |

Data are expressed as the frequency (percentage) of patients, unless otherwise indicated.

<sup>†</sup>To includes diabetes mellitus, hypertension, dyslipidemia, stroke and heart disease, chronic kidney disease, chronic lung disease, and cancer.

Abbreviations: COVID-19, coronavirus disease-2019; COVID-PSS, coronavirus disease-2019 Public Stigma Scale; NCDs, non-communicable diseases.

**Table S1** Participants Characteristics According to the Degree of COVID-19-Related Public Stigma in Thailand (Continued)

| Characteristics                                                      | Overall<br>(n=4,004) | COVID-19-related public stigma                 |                                                    |                                            | P Value |
|----------------------------------------------------------------------|----------------------|------------------------------------------------|----------------------------------------------------|--------------------------------------------|---------|
|                                                                      |                      | No/minimal:<br>COVID-PSS ≤18<br>points (n=983) | Moderate:<br>COVID-PSS 19 –<br>25 points (n=1,364) | High:<br>COVID-PSS ≥26<br>points (n=1,657) |         |
| Information exposure during the COVID-19 pandemic                    |                      |                                                |                                                    |                                            |         |
| <1 hour/day                                                          | 1,481 (37.0)         | 408 (41.5)                                     | 503 (36.9)                                         | 570 (34.4)                                 | 0.001   |
| 1–2 hours/day                                                        | 1,644 (41.1)         | 391 (39.8)                                     | 571 (41.9)                                         | 682 (41.2)                                 |         |
| ≥3 hours/day                                                         | 879 (21.9)           | 184 (18.7)                                     | 290 (21.3)                                         | 405 (24.4)                                 |         |
| Confirmed cases in the community                                     |                      |                                                |                                                    |                                            |         |
| No                                                                   | 2,562 (64.0)         | 637 (64.8)                                     | 871 (63.9)                                         | 1,054 (63.6)                               | 0.113   |
| Yes                                                                  | 641 (16.0)           | 136 (13.8)                                     | 215 (15.8)                                         | 290 (17.5)                                 |         |
| Not known                                                            | 801 (20.0)           | 210 (21.4)                                     | 278 (20.4)                                         | 313 (18.9)                                 |         |
| Quarantine status                                                    |                      |                                                |                                                    |                                            |         |
| Never                                                                | 1,781 (44.5)         | 486 (49.4)                                     | 567 (41.6)                                         | 728 (43.9)                                 | 0.004   |
| Past                                                                 | 1,575 (39.3)         | 359 (36.5)                                     | 563 (41.3)                                         | 653 (39.4)                                 |         |
| Current                                                              | 648 (16.2)           | 138 (14.1)                                     | 234 (17.1)                                         | 276 (16.7)                                 |         |
| Working from home                                                    | 3,139 (78.4)         | 774 (78.7)                                     | 1,071 (78.5)                                       | 1,294 (78.1)                               | 0.920   |
| Multidimensional scale of perceived social support, mean (SD); range | 59.1 (13.7); 12–84   | 58.0 (13.8); 12–84                             | 59.7 (13.2); 12–84                                 | 59.2 (14.1); 12–84                         | 0.016   |
| Low perceived support                                                | 226 (5.6)            | 59 (6.0)                                       | 69 (5.1)                                           | 98 (5.9)                                   | <0.001  |
| Moderate perceived support                                           | 1,833 (45.8)         | 501 (51.0)                                     | 574 (42.1)                                         | 658 (45.8)                                 |         |
| High perceived support                                               | 1,945 (48.6)         | 423 (43.0)                                     | 721 (52.9)                                         | 801 (48.3)                                 |         |
| Brief resilient coping scale, mean (SD); range                       | 13.9 (3.1); 4–20     | 13.9 (3.1); 4–20                               | 13.8 (3.1); 4–20                                   | 13.9 (3.0); 4–20                           | 0.416   |
| Low resilient copers                                                 | 678 (16.9)           | 165 (16.8)                                     | 234 (17.2)                                         | 279 (16.8)                                 | 0.967   |
| Medium resilient copers                                              | 1,570 (39.2)         | 393 (40.0)                                     | 525 (38.5)                                         | 652 (39.4)                                 |         |
| High resilient copers                                                | 1,756 (43.9)         | 425 (43.2)                                     | 605 (44.3)                                         | 726 (43.8)                                 |         |

Data are expressed as the frequency (percentage) of patients, unless otherwise indicated.

Abbreviations: COVID-19, coronavirus disease-2019; COVID-PSS, coronavirus disease-2019 Public Stigma Scale; SD, standard deviation.

**Table S1** Participants Characteristics According to the Degree of COVID-19-Related Public Stigma in Thailand (Continued)

| Characteristics                                        | Overall<br>(n=4,004) | COVID-19-related public stigma                 |                                                    |                                            | P Value |
|--------------------------------------------------------|----------------------|------------------------------------------------|----------------------------------------------------|--------------------------------------------|---------|
|                                                        |                      | No/minimal:<br>COVID-PSS ≤18<br>points (n=983) | Moderate:<br>COVID-PSS 19 –<br>25 points (n=1,364) | High:<br>COVID-PSS ≥26<br>points (n=1,657) |         |
| Fear of COVID-19, mean (SD); range                     | 6.6 (1.8); 1–10      | 5.0 (1.5); 1–9                                 | 6.3 (1.4); 2–10                                    | 7.8 (1.4); 3–10                            | <0.001  |
| No/minimal                                             | 200 (5.0)            | 169 (17.2)                                     | 29 (2.1)                                           | 2 (0.1)                                    | <0.001  |
| Moderate                                               | 1,698 (42.4)         | 662 (67.3)                                     | 754 (55.3)                                         | 282 (17.0)                                 |         |
| Severe                                                 | 2,106 (52.6)         | 152 (15.5)                                     | 581 (42.6)                                         | 1,373 (82.9)                               |         |
| Perceived risk of COVID-19 infection, mean (SD); range | 5.5 (2.2); 2–10      | 3.3 (1.2); 2–10                                | 5.1 (1.5); 2–10                                    | 7.2 (1.6); 2–10                            | <0.001  |
| Low perceived risk                                     | 767 (19.1)           | 584 (59.4)                                     | 171 (12.5)                                         | 12 (0.7)                                   | <0.001  |
| Medium perceived risk                                  | 1,997 (49.9)         | 385 (39.2)                                     | 990 (72.6)                                         | 622 (37.5)                                 |         |
| High perceived risk                                    | 1,240 (31.0)         | 14 (1.4)                                       | 203 (14.9)                                         | 1,023 (61.7)                               |         |

Data are expressed as the frequency (percentage) of patients, unless otherwise indicated.

Abbreviations: COVID-19, coronavirus disease-2019; COVID-PSS, coronavirus disease-2019 Public Stigma Scale; SD, standard deviation.

**Table S2** Linear Regression Model Results of Factors Associated with COVID-19-Related Public Stigma (n=4,004)

| <b>Factors</b>                                | <b>Unadjusted beta coefficient (95% CI)<sup>†</sup></b> | <b>P value</b> | <b>Adjusted beta coefficient (95% CI)<sup>†</sup></b> | <b>P value</b> |
|-----------------------------------------------|---------------------------------------------------------|----------------|-------------------------------------------------------|----------------|
| Age, year                                     |                                                         |                |                                                       |                |
| ≤30                                           | Reference (1.00)                                        |                | Reference (1.00)                                      |                |
| 31–50                                         | 0.49 (-0.24 to 1.22)                                    | 0.188          | 0.98 (0.42 to 1.54)                                   | 0.001          |
| ≥51                                           | 5.39 (3.99 to 6.79)                                     | <0.001         | 3.03 (1.80 to 4.26)                                   | <0.001         |
| Sexual identity                               |                                                         |                |                                                       |                |
| Female                                        | Reference (1.00)                                        |                | Reference (1.00)                                      |                |
| Male                                          | 1.09 (0.38 to 1.81)                                     | 0.003          | 1.03 (0.54 to 1.52)                                   | <0.001         |
| Others                                        | -1.49 (-3.26 to 0.28)                                   | 0.099          | 0.13 (-0.91 to 1.18)                                  | 0.803          |
| Marital status                                |                                                         |                |                                                       |                |
| Single                                        | Reference (1.00)                                        |                | Reference (1.00)                                      |                |
| Married/domestic partnership                  | 3.10 (2.16 to 4.04)                                     | <0.001         | 0.98 (0.27 to 1.69)                                   | 0.007          |
| Divorced/widowed/ separated                   | 3.83 (1.91 to 5.75)                                     | <0.001         | 1.01 (-0.50 to 2.52)                                  | 0.189          |
| Education level                               |                                                         |                |                                                       |                |
| Illiterate/primary school/ junior high school | Reference (1.00)                                        |                | Reference (1.00)                                      |                |
| Senior high school/diploma/ high vocational   | -0.98 (-3.26 to 1.30)                                   | 0.398          | ...                                                   | ...            |
| Bachelor's degree/ higher education           | -0.11 (-2.40 to 2.17)                                   | 0.924          | ...                                                   | ...            |
| Occupation                                    |                                                         |                |                                                       |                |
| Unemployed/retried                            | Reference (1.00)                                        |                | Reference (1.00)                                      |                |
| Employed                                      | 0.16 (-1.05 to 1.36)                                    | 0.799          | ...                                                   | ...            |
| College student                               | -0.45 (-1.66 to 0.76)                                   | 0.466          | ...                                                   | ...            |
| Religion                                      |                                                         |                |                                                       |                |
| Irreligion                                    | Reference (1.00)                                        |                | Reference (1.00)                                      |                |
| Buddhist                                      | 2.45 (1.46 to 3.44)                                     | <0.001         | 1.19 (0.54 to 1.83)                                   | <0.001         |
| Christian/Muslim/Others                       | 2.06 (0.36 to 3.76)                                     | 0.018          | 0.92 (-0.19 to 2.02)                                  | 0.104          |

<sup>†</sup>The effect estimates are presented weighted.

Abbreviations: CI, confidence interval; COVID-19, coronavirus disease-2019; COVID-PSS, coronavirus disease-2019 Public Stigma Scale.

**Table S2** Linear Regression Model Results of Factors Associated with COVID-19-Related Public Stigma (n=4,004) (Continued)

| Factors                              | Unadjusted beta coefficient (95% CI) <sup>†</sup> | P value | Adjusted beta coefficient (95% CI) <sup>†</sup> | P value |
|--------------------------------------|---------------------------------------------------|---------|-------------------------------------------------|---------|
| Region of residence                  |                                                   |         |                                                 |         |
| Capital city and its environs        | Reference (1.00)                                  |         | Reference (1.00)                                |         |
| Non-capital city and its environs    | 1.02 (0.46 to 1.59)                               | <0.001  | 0.40 (0.03 to 0.77)                             | 0.035   |
| Living status                        |                                                   |         |                                                 |         |
| Alone                                | Reference (1.00)                                  |         | Reference (1.00)                                |         |
| With family                          | 1.10 (0.20 to 1.99)                               | 0.017   | ...                                             | ...     |
| With others                          | -0.69 (-2.12 to 0.73)                             | 0.340   | ...                                             | ...     |
| Person income, baht/month            |                                                   |         |                                                 |         |
| ≤10,000                              | Reference (1.00)                                  |         | Reference (1.00)                                |         |
| 10,001 – 20,000                      | -0.51 (-1.32 to 0.30)                             | 0.214   | ...                                             | ...     |
| >20,000                              | 1.11 (0.34 to 1.87)                               | 0.005   | ...                                             | ...     |
| Reimbursement scheme                 |                                                   |         |                                                 |         |
| Government/state enterprises         | Reference (1.00)                                  |         | Reference (1.00)                                |         |
| Universal coverage scheme            | -1.82 (-2.88 to -0.75)                            | 0.001   | ...                                             | ...     |
| Social security scheme               | -1.40 (-2.49 to -0.31)                            | 0.012   | ...                                             | ...     |
| Self-payment/others                  | -1.71 (-2.77 to -0.64)                            | 0.002   | ...                                             | ...     |
| History of mental illness            |                                                   |         |                                                 |         |
| No                                   | Reference (1.00)                                  |         | Reference (1.00)                                |         |
| Yes                                  | -0.83 (-1.97 to 0.30)                             | 0.150   | ...                                             | ...     |
| History of chronic NCDs <sup>‡</sup> |                                                   |         |                                                 |         |
| No                                   | Reference (1.00)                                  |         | Reference (1.00)                                |         |
| Yes                                  | 2.28 (1.34 to 3.23)                               | <0.001  | ...                                             | ...     |

<sup>†</sup>The effect estimates are presented weighted.

<sup>‡</sup>To includes diabetes mellitus, hypertension, dyslipidemia, stroke and heart disease, chronic kidney disease, chronic lung disease, and cancer.

Abbreviations: CI, confidence interval; COVID-19, coronavirus disease-2019; COVID-PSS, coronavirus disease-2019 Public Stigma Scale; NCD, non-communicable diseases.

**Table S2** Linear Regression Model Results of Factors Associated with COVID-19-Related Public Stigma (n=4,004) (Continued)

| <b>Factors</b>                                    | <b>Unadjusted beta coefficient (95% CI)<sup>†</sup></b> | <b>P value</b> | <b>Adjusted beta coefficient (95% CI)<sup>†</sup></b> | <b>P value</b> |
|---------------------------------------------------|---------------------------------------------------------|----------------|-------------------------------------------------------|----------------|
| Income loss during the COVID-19 pandemic          |                                                         |                |                                                       |                |
| No                                                | Reference (1.00)                                        |                | Reference (1.00)                                      |                |
| Yes                                               | 0.28 (-0.40 to 0.95)                                    | 0.418          | ...                                                   | ...            |
| Financial problems during the COVID-19 pandemic   |                                                         |                |                                                       |                |
| No                                                | Reference (1.00)                                        |                | Reference (1.00)                                      |                |
| Yes                                               | 0.53 (-0.12 to 1.17)                                    | 0.111          | ...                                                   | ...            |
| Information exposure during the COVID-19 pandemic |                                                         |                |                                                       |                |
| <1 hour/day                                       | Reference (1.00)                                        |                | Reference (1.00)                                      |                |
| 1–2 hours/day                                     | 0.54 (-0.17 to 1.25)                                    | 0.136          | ...                                                   | ...            |
| ≥3 hours/day                                      | 1.33 (0.41 to 2.26)                                     | 0.005          | ...                                                   | ...            |
| Confirmed cases in the community                  |                                                         |                |                                                       |                |
| No                                                | Reference (1.00)                                        |                | Reference (1.00)                                      |                |
| Yes                                               | 0.45 (-0.36 to 1.26)                                    | 0.280          | ...                                                   | ...            |
| Not known                                         | -0.47 (-1.25 to 0.32)                                   | 0.244          | ...                                                   | ...            |
| Quarantine status                                 |                                                         |                |                                                       |                |
| Never                                             | Reference (1.00)                                        |                | Reference (1.00)                                      |                |
| Past                                              | 0.74 (0.02 to 1.46)                                     | 0.043          | 0.79 (0.32 to 1.27)                                   | 0.001          |
| Current                                           | 0.56 (-0.35 to 1.48)                                    | 0.228          | 0.64 (0.01 to 1.27)                                   | 0.046          |
| Working from home                                 |                                                         |                |                                                       |                |
| No                                                | Reference (1.00)                                        |                | Reference (1.00)                                      |                |
| Yes                                               | -0.17 (-0.98 to 0.65)                                   | 0.688          | ...                                                   | ...            |
| Perceived social support                          |                                                         |                |                                                       |                |
| Low perceived support                             | Reference (1.00)                                        |                | Reference (1.00)                                      |                |
| Moderate perceived support                        | 0.97 (-0.34 to 2.29)                                    | 0.147          | ...                                                   | ...            |
| High perceived support                            | 1.92 (0.61 to 3.22)                                     | 0.004          | ...                                                   | ...            |

<sup>†</sup>The effect estimates are presented weighted.

Abbreviations: CI, confidence interval; COVID-19, coronavirus disease-2019; COVID-PSS, coronavirus disease-2019 Public Stigma Scale.

**Table S2** Linear Regression Model Results of Factors Associated with COVID-19-Related Public Stigma (n=4,004) (Continued)

| <b>Factors</b>                       | <b>Unadjusted beta coefficient (95% CI)<sup>†</sup></b> | <b>P value</b> | <b>Adjusted beta coefficient (95% CI)<sup>†</sup></b> | <b>P value</b> |
|--------------------------------------|---------------------------------------------------------|----------------|-------------------------------------------------------|----------------|
| Resilient coping                     |                                                         |                |                                                       |                |
| Low resilient copers                 | Reference (1.00)                                        |                | Reference (1.00)                                      |                |
| Medium resilient copers              | -1.01 (-2.03 to 0.01)                                   | 0.052          | -0.76 (-1.46 to -0.05)                                | 0.036          |
| High resilient copers                | -1.00 (-1.97 to -0.03)                                  | 0.043          | -0.82 (-1.51 to -0.14)                                | 0.019          |
| Fear of COVID-19                     |                                                         |                |                                                       |                |
| No/minimal                           | Reference (1.00)                                        |                | Reference (1.00)                                      |                |
| Moderate                             | 5.01 (4.23 to 5.79)                                     | <0.001         | 2.06 (1.35 to 2.76)                                   | <0.001         |
| Severe                               | 12.76 (11.94 to 13.57)                                  | <0.001         | 5.11 (4.30 to 5.92)                                   | <0.001         |
| Perceived risk of COVID-19 infection |                                                         |                |                                                       |                |
| Low perceived risk                   | Reference (1.00)                                        |                | Reference (1.00)                                      |                |
| Medium perceived risk                | 6.95 (6.43 to 7.47)                                     | <0.001         | 5.60 (5.05 to 6.15)                                   | <0.001         |
| High perceived risk                  | 15.11 (14.46 to 15.76)                                  | <0.001         | 12.21 (11.47 to 12.96)                                | <0.001         |

<sup>†</sup>The effect estimates are presented weighted.

Abbreviations: CI, confidence interval; COVID-19, coronavirus disease-2019; COVID-PSS, coronavirus disease-2019 Public Stigma Scale.
